# Supplementary material
Source: publisher site journal article supplement (https://www.dovepress.com/article/252154)
Supplement: Supplementary file 1 [file get_supplementary_file.php]

**Supplementary Table 1a.** Characteristics of men and women participants between TSH levels which were divided into four groups

| Men                                               | All                  | Q1                   | Q2                   | Q3                   | Q4                   | P-value          |
|---------------------------------------------------|----------------------|----------------------|----------------------|----------------------|----------------------|------------------|
| TSH ( $\mu$ IU/ml)                                | 0.55-4.78            | 0.55-1.30            | 1.31-1.85            | 1.85-2.58            | 2.59-4.78            |                  |
| N                                                 | 1,831                | 558                  | 522                  | 407                  | 344                  | -                |
| Age (years)                                       | 49.66 $\pm$ 11.89    | 48.97 $\pm$ 12.21    | 48.99 $\pm$ 11.50    | 49.68 $\pm$ 11.38    | 51.76 $\pm$ 12.33    | <b>0.003</b>     |
| BMI (kg/m <sup>2</sup> )                          | 26.15 $\pm$ 3.75     | 25.73 $\pm$ 3.73     | 26.31 $\pm$ 3.74     | 26.01 $\pm$ 3.53     | 26.74 $\pm$ 3.98     | <b>0.001</b>     |
| Obesity (BMI $\geq$ 28 kg/m <sup>2</sup> ) (n, %) | 532 (29.1)           | 145 (26.0)           | 156 (29.9)           | 105 (25.8)           | 126 (36.6)           | <b>0.002</b>     |
| WC (cm)                                           | 89.40 $\pm$ 10.24    | 88.18 $\pm$ 10.27    | 90.16 $\pm$ 10.01    | 89.02 $\pm$ 9.94     | 90.66 $\pm$ 10.69    | <b>0.001</b>     |
| SBP (mmHg)                                        | 132 $\pm$ 17         | 132 $\pm$ 17         | 132 $\pm$ 16         | 131 $\pm$ 16         | 133 $\pm$ 18         | 0.442            |
| DBP (mmHg)                                        | 81 $\pm$ 12          | 81 $\pm$ 12          | 82 $\pm$ 11          | 81 $\pm$ 11          | 81 $\pm$ 12          | 0.688            |
| HbA1c (%)                                         | 5.83 $\pm$ 0.99      | 5.78 $\pm$ 0.92      | 5.84 $\pm$ 0.96      | 5.77 $\pm$ 0.83      | 5.97 $\pm$ 1.27      | <b>0.023</b>     |
| FPG (mmol/l)                                      | 6.25 $\pm$ 1.75      | 6.18 $\pm$ 1.67      | 6.25 $\pm$ 1.86      | 6.26 $\pm$ 1.69      | 6.33 $\pm$ 1.76      | 0.622            |
| FINS (uIU/ml)                                     | 9.56 $\pm$ 6.74      | 8.87 $\pm$ 6.27      | 10.01 $\pm$ 7.36     | 9.44 $\pm$ 6.19      | 10.13 $\pm$ 7.01     | <b>0.012</b>     |
| HOMA-IR (mU/L·mM)                                 | 2.12 (1.29, 3.36)    | 1.92 (1.23, 3.00)    | 2.31 (1.37, 3.45)    | 2.20 (1.28, 3.31)    | 2.26 (1.32, 3.73)    | <b>0.010</b>     |
| TG (mmol/l)                                       | 1.29 (0.83, 2.13)    | 1.18 (0.74, 1.89)    | 1.43 (0.97, 2.23)    | 1.27 (0.81, 2.11)    | 1.29 (0.82, 2.24)    | <b>&lt;0.001</b> |
| TC (mmol/l)                                       | 4.89 $\pm$ 0.95      | 4.85 $\pm$ 0.95      | 4.95 $\pm$ 0.94      | 4.80 $\pm$ 0.96      | 4.95 $\pm$ 0.93      | <b>0.040</b>     |
| HDL-C (mmol/l)                                    | 1.11 $\pm$ 0.32      | 1.13 $\pm$ 0.33      | 1.09 $\pm$ 0.30      | 1.09 $\pm$ 0.31      | 1.12 $\pm$ 0.33      | 0.067            |
| LDL-C (mmol/l)                                    | 2.83 $\pm$ 0.79      | 2.79 $\pm$ 0.79      | 2.91 $\pm$ 0.79      | 2.75 $\pm$ 0.78      | 2.89 $\pm$ 0.81      | <b>0.006</b>     |
| UA ( $\mu$ mol/l)                                 | 324.29 $\pm$ 78.41   | 314.69 $\pm$ 74.97   | 332.12 $\pm$ 81.21   | 325.37 $\pm$ 77.15   | 326.72 $\pm$ 79.75   | <b>0.003</b>     |
| FT4 (pmol/l)                                      | 16.63 (15.18, 18.24) | 17.04 (15.50, 18.62) | 16.67 (15.42, 18.35) | 16.66 (15.13, 18.19) | 15.89 (14.40, 17.48) | <b>&lt;0.001</b> |
| FT3 (pmol/l)                                      | 5.20 (4.88, 5.54)    | 5.25 (4.94, 5.58)    | 5.21 (4.91, 5.54)    | 5.20 (4.86, 5.53)    | 5.13 (4.80, 5.46)    | <b>0.012</b>     |
| Antibodys (n, %)                                  |                      |                      |                      |                      |                      | <b>0.018</b>     |
| TPOAb and TGAAb (-)                               | 1,655 (90.4)         | 505 (90.8)           | 479 (91.8)           | 366 (89.9)           | 305 (88.7)           |                  |
| TPOAb or TGAAb (+)                                | 131 (7.2)            | 42 (7.5)             | 36 (6.9)             | 32 (7.9)             | 21 (6.1)             |                  |
| TPOAb and TGAAb (+)                               | 45 (2.5)             | 11 (2.0)             | 7 (1.3)              | 9 (2.2)              | 18 (5.2)             |                  |

|                                                         |              |            |            |            |            |                  |
|---------------------------------------------------------|--------------|------------|------------|------------|------------|------------------|
| MetS (n, %)                                             | 781 (42.7)   | 217 (38.9) | 233 (44.6) | 167 (41.0) | 164 (47.7) | <b>0.045</b>     |
| Smoking (n, %)                                          |              |            |            |            |            | <b>&lt;0.001</b> |
| Nonsmoker                                               | 373 (20.4)   | 94 (16.8)  | 100 (19.2) | 97 (23.8)  | 82 (23.8)  |                  |
| Ex-smoker                                               | 280 (15.3)   | 75 (13.4)  | 70 (13.4)  | 63 (15.5)  | 72 (20.9)  |                  |
| Current smoker                                          | 1,178 (64.3) | 389 (69.7) | 352 (67.4) | 247 (60.7) | 190 (55.2) |                  |
| Alcohol drinking (g/week) (n, %)                        |              |            |            |            |            | 0.096            |
| 0                                                       | 535 (29.2)   | 160 (28.7) | 132 (25.3) | 131 (32.2) | 112 (32.6) |                  |
| 0.1-140                                                 | 728 (39.8)   | 226 (40.5) | 230 (44.1) | 156 (38.3) | 116 (33.7) |                  |
| 140.1-210                                               | 54 (2.9)     | 17 (3.0)   | 16 (3.1)   | 14 (3.4)   | 7 (2.0)    |                  |
| >210                                                    | 514 (28.1)   | 155 (27.8) | 144 (27.6) | 106 (26.0) | 109 (31.7) |                  |
| Red meat consumption $\geq 7$ times per week (%) (n, %) | 842 (46.0)   | 257 (46.1) | 251 (48.1) | 186 (45.7) | 148 (43.0) | 0.541            |
| Sedentary time (n, %)                                   |              |            |            |            |            | 0.692            |
| <1.5                                                    | 120 (6.6)    | 39 (7.0)   | 28 (5.4)   | 29 (7.1)   | 24 (7.0)   |                  |
| 1.5-2.5                                                 | 405 (22.1)   | 112 (20.1) | 124 (23.8) | 89 (21.9)  | 80 (23.3)  |                  |
| 2.5-3.5                                                 | 391 (21.4)   | 127 (22.8) | 112 (21.5) | 76 (18.7)  | 76 (22.2)  |                  |
| 3.5-4.5                                                 | 312 (17.0)   | 89 (15.9)  | 88 (16.9)  | 82 (20.1)  | 53 (15.4)  |                  |
| $\geq 4.5$                                              | 603 (32.9)   | 191 (34.2) | 170 (32.6) | 131 (32.2) | 111 (32.3) |                  |

Supplementary Table 1b.

| Women                                             | All               | Q1                | Q2                | Q3                | Q4                | <i>P</i> -value  |
|---------------------------------------------------|-------------------|-------------------|-------------------|-------------------|-------------------|------------------|
| TSH ( $\mu$ IU/ml)                                | 0.55-4.78         | 0.55-1.30         | 1.31-1.85         | 1.85-2.58         | 2.59-4.78         |                  |
| N                                                 | 1,742             | 327               | 384               | 478               | 553               | -                |
| Age (years)                                       | 49.97 $\pm$ 11.58 | 51.04 $\pm$ 12.36 | 49.41 $\pm$ 12.51 | 48.63 $\pm$ 10.91 | 50.88 $\pm$ 10.85 | <b>0.004</b>     |
| BMI (kg/m <sup>2</sup> )                          | 26.02 $\pm$ 3.90  | 25.60 $\pm$ 3.44  | 25.82 $\pm$ 3.87  | 26.01 $\pm$ 3.84  | 26.42 $\pm$ 4.20  | <b>0.014</b>     |
| Obesity (BMI $\geq 28$ kg/m <sup>2</sup> ) (n, %) | 488 (28.0)        | 70 (21.4)         | 101 (26.3)        | 127 (26.6)        | 190 (34.4)        | <b>&lt;0.001</b> |
| WC (cm)                                           | 84.06 $\pm$ 10.81 | 83.27 $\pm$ 9.84  | 84.01 $\pm$ 11.07 | 83.33 $\pm$ 10.74 | 85.18 $\pm$ 11.17 | <b>0.020</b>     |

|                                  |                         |                         |                         |                         |                         |                  |
|----------------------------------|-------------------------|-------------------------|-------------------------|-------------------------|-------------------------|------------------|
| SBP (mmHg)                       | 128±19                  | 128±19                  | 127±19                  | 127±18                  | 130±19                  | 0.069            |
| DBP (mmHg)                       | 77±11                   | 75±10                   | 76±11                   | 77±11                   | 78±11                   | <b>0.006</b>     |
| HbA1c (%)                        | 5.81±0.86               | 5.86±0.92               | 5.77±0.86               | 5.74±0.72               | 5.85±0.94               | 0.108            |
| FPG (mmol/l)                     | 5.88±1.45               | 5.97±1.59               | 5.82±1.43               | 5.78±1.23               | 5.94±1.55               | 0.197            |
| FINS (uIU/ml)                    | 9.69±5.85               | 9.39±7.01               | 9.57±5.26               | 9.68±5.45               | 9.96±5.81               | 0.534            |
| HOMA-IR (mU/L·mM)                | 2.12 (1.44, 3.14)       | 2.03 (1.44, 3.12)       | 2.16 (1.43, 3.09)       | 2.11 (1.42, 3.14)       | 2.20 (1.47, 3.25)       | 0.575            |
| TG (mmol/l)                      | 1.12 (0.72, 1.66)       | 1.07 (0.69, 1.55)       | 1.06 (0.71, 1.59)       | 1.12 (0.72, 1.68)       | 1.21 (0.76, 1.81)       | <b>0.020</b>     |
| TC (mmol/l)                      | 4.93±1.00               | 4.95±1.02               | 4.93±1.08               | 4.92±0.94               | 4.94±0.98               | 0.986            |
| HDL-C (mmol/l)                   | 1.21±0.29               | 1.23±0.29               | 1.23±0.27               | 1.22±0.33               | 1.19±0.27               | 0.070            |
| LDL-C (mmol/l)                   | 2.89±0.81               | 2.91±0.82               | 2.89±0.81               | 2.88±0.78               | 2.90±0.83               | 0.943            |
| UA (μmol/l)                      | 246.93±61.96            | 241.86±58.85            | 242.54±58.97            | 249.33±64.98            | 250.91±62.87            | 0.068            |
| FT4 (pmol/l)                     | 15.53 (14.23,<br>16.84) | 15.90 (14.71,<br>17.59) | 15.77 (14.54,<br>16.88) | 15.21 (14.05,<br>16.61) | 15.30 (14.05,<br>16.58) | <b>&lt;0.001</b> |
| FT3 (pmol/l)                     | 4.78 (4.49, 5.06)       | 4.79 (4.46, 5.07)       | 4.77 (4.47, 5.07)       | 4.79 (4.50, 5.03)       | 4.78 (4.50, 5.08)       | 0.871            |
| Antibodys (n, %)                 |                         |                         |                         |                         |                         | <b>&lt;0.001</b> |
| TPOAb and TGAAb (-)              | 1,380 (79.2)            | 279 (85.3)              | 324 (84.4)              | 377 (78.9)              | 400 (72.3)              |                  |
| TPOAb or TGAAb (+)               | 206 (11.8)              | 29 (8.9)                | 44 (11.5)               | 56 (11.7)               | 77 (13.9)               |                  |
| TPOAb and TGAAb (+)              | 156 (9.0)               | 19 (5.8)                | 16 (4.2)                | 45 (9.4)                | 76 (13.7)               |                  |
| MetS (n, %)                      | 861 (49.4)              | 156 (47.7)              | 179 (46.6)              | 224 (46.9)              | 302 (54.6)              | <b>0.032</b>     |
| Postmenopausal status (n, %)     | 850 (48.8)              | 170 (52.0)              | 183 (47.7)              | 202 (42.3)              | 295 (53.3)              | <b>0.003</b>     |
| Smoking (n, %)                   |                         |                         |                         |                         |                         | 0.622            |
| Nonsmoker                        | 1,724 (99.0)            | 324 (99.1)              | 380 (99.0)              | 474 (97.2)              | 546 (98.7)              |                  |
| Ex-smoker                        | 2 (0.1)                 | 0 (0)                   | 0 (0)                   | 0 (0)                   | 2 (0.4)                 |                  |
| Current smoker                   | 16 (0.9)                | 3 (0.9)                 | 4 (1.0)                 | 4 (0.8)                 | 5 (0.9)                 |                  |
| Alcohol drinking (g/week) (n, %) |                         |                         |                         |                         |                         | 0.648            |
| 0                                | 1,565 (89.8)            | 292 (89.3)              | 351 (91.4)              | 430 (90.0)              | 492 (89.0)              |                  |

|                                                         |            |            |            |            |            |              |
|---------------------------------------------------------|------------|------------|------------|------------|------------|--------------|
| 0.1-70                                                  | 132 (7.6)  | 25 (7.6)   | 25 (6.5)   | 36 (7.5)   | 46 (8.3)   |              |
| 70.1-140                                                | 20 (1.1)   | 7 (2.1)    | 2 (0.5)    | 6 (1.3)    | 5 (0.9)    |              |
| >140                                                    | 25 (1.4)   | 3 (0.9)    | 6 (1.6)    | 6 (1.3)    | 10 (1.8)   |              |
| Red meat consumption $\geq 7$ times per week (%) (n, %) | 582 (33.4) | 133 (40.7) | 126 (32.8) | 159 (33.3) | 164 (29.7) | <b>0.010</b> |
| Sedentary time (hours/day) (n, %)                       |            |            |            |            |            | <b>0.005</b> |
| <1.5                                                    | 125 (7.2)  | 15 (4.6)   | 29 (7.6)   | 45 (9.4)   | 36 (6.5)   |              |
| 1.5-2.5                                                 | 426 (24.5) | 75 (22.9)  | 102 (26.6) | 125 (26.2) | 124 (22.4) |              |
| 2.5-3.5                                                 | 485 (27.8) | 106 (32.4) | 81 (21.1)  | 142 (29.7) | 156 (28.2) |              |
| 3.5-4.5                                                 | 321 (18.4) | 61 (18.7)  | 71 (18.5)  | 84 (17.6)  | 105 (19.0) |              |
| $\geq 4.5$                                              | 385 (22.1) | 70 (21.4)  | 101 (26.3) | 82 (17.2)  | 132 (23.9) |              |

**Notes:** Data were expressed as means  $\pm$  SD for continuous data with normal distribution, median (25th, 75th percentage) for continuous data with skewed distribution, and n (%) for categorical data. *P*-value was for the difference for the difference among the TSH quartiles using one-way ANOVA for normal distributed data, Kruskal-Wallis test for skewed distributed data, and chi-squared test for categorical data. *P*-value <0.05 was considered significant and in boldface.

**Abbreviations:** TSH, thyrotropin; Q, quartile; BMI, body mass index; WC, waist circumference; SBP, systolic blood pressure; DBP, diastolic blood pressure; HbA1c, haemoglobin A1c; FPG, fasting plasma glucose; FINS, fasting insulin; HOMA-IR, homeostasis model assessment of insulin resistance; TG, triglycerides; TC, total cholesterol; HDL-C, high-density lipoprotein cholesterol; LDL-C, low-density lipoprotein cholesterol; UA, uric acid; FT4, free thyroxine; FT3, free triiodothyronine; TPOAb, thyroid peroxidase antibody; TGAb, thyroglobulin antibody; MetS, metabolic syndrome.

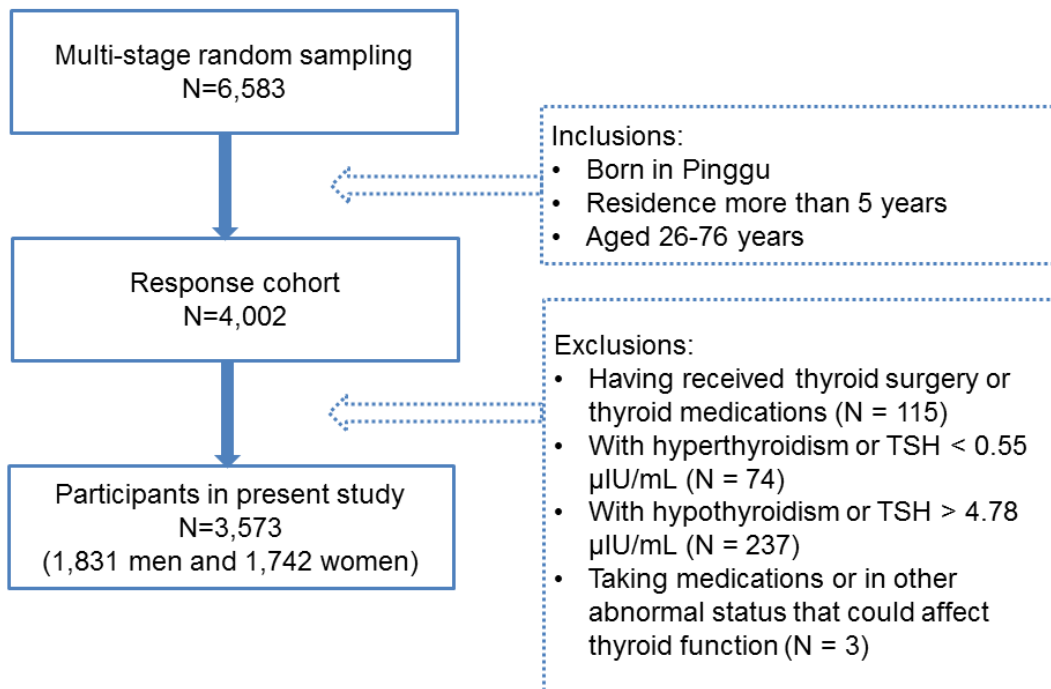

**Figure S1** Flow diagram for the participants recruitment. **Abbreviations:** PMDS, Pinggu Metabolic Disease Study; TSH, thyrotropin.
